# Supplementary material for: Metabolomic and Proteomic Profiling of Athletes Performing Physical Activity under Hypoxic Conditions
Source: MDPI journal article supplement (doi:10.3390/sports12030072), 2024-03-05
Supplement: s1 [file s1]

## ELISA

Determining the concentration of erythropoietin, interleukin-18 vascular endothelial growth factor, alfa-interferon and tumor necrosis factor were assessed by "sandwich" - option solid-phase enzyme-linked mimmunosorbent assay (ELISA) using a commercial reagent kits («Vector-Best », Russia).

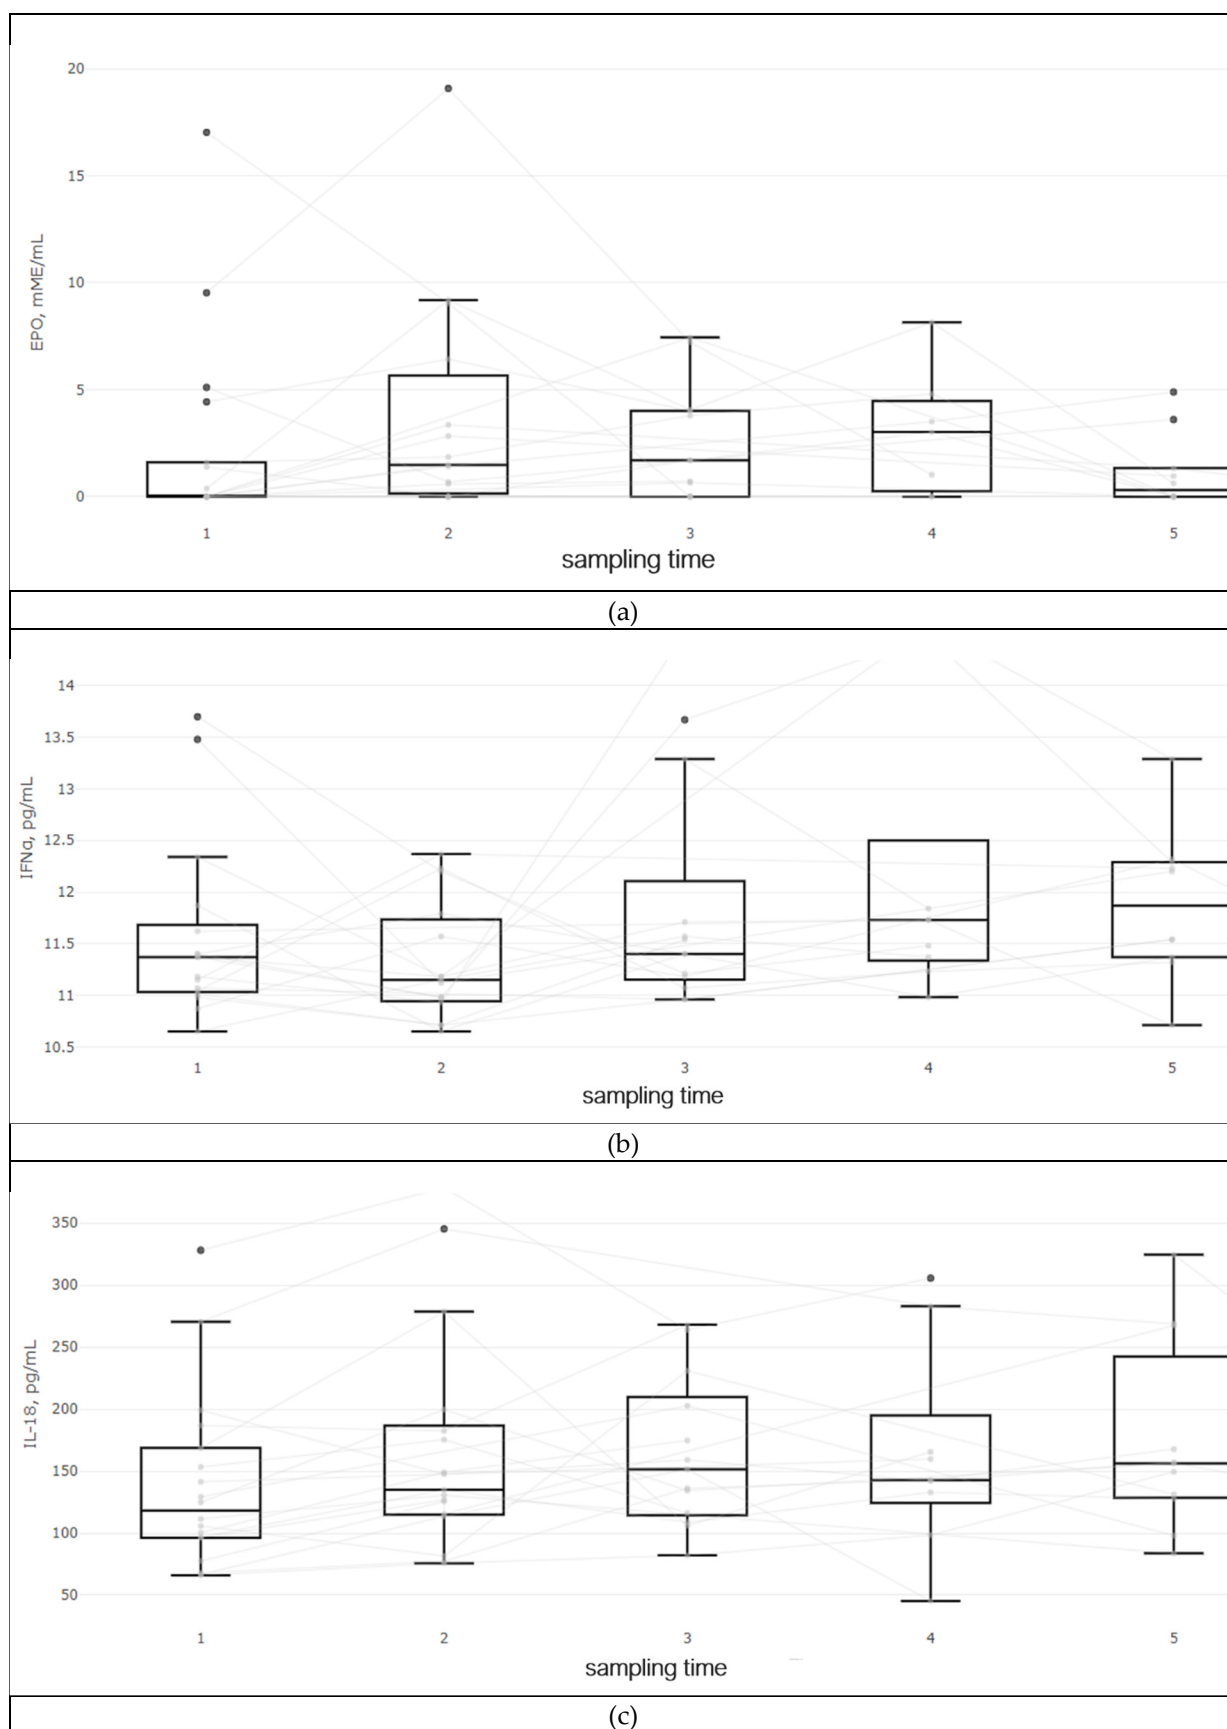

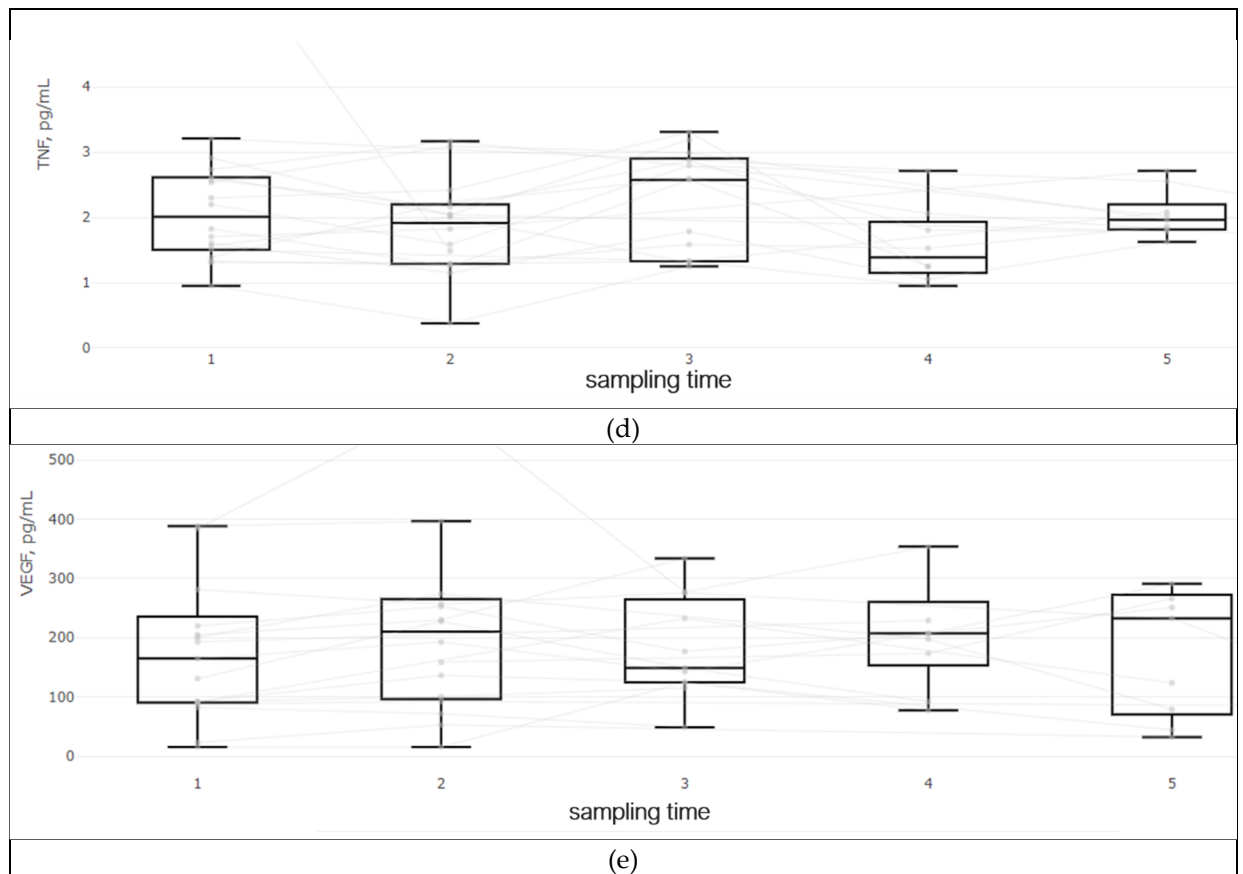

**Figure S1.** Results of quantitative determination of the content of erythropoietin (a), alpha-interferon (b), interleikin-18 (c), tumor necrosis factor (d) and vascular endothelial growth factor (e) in the blood plasma of athletes.
